# Supplementary material for: Nano-sized iron oxides supported on polyester textile to remove fluoroquinolones in hospital wastewater
Source: Royal Society of Chemistry journal article supplement (doi:10.1039/d0en00261e), 2020-01-01
Supplement: d0en00261e1.pdf [file d0en00261e1.pdf]

† **Electronic supplementary information (ESI)**

**Nano-sized iron oxides supported on polyester textile to remove  
fluoroquinolones in hospital wastewater**

**Gnougou Nina COULIBALY<sup>a</sup>, Sami RTIMI<sup>b</sup>, Aymen Amin ASSADI<sup>a</sup>, Khalil  
HANNA<sup>a,c\*</sup>**

<sup>a</sup> *Univ Rennes, École Nationale Supérieure de Chimie de Rennes, CNRS, ISCR –  
UMR6226, F-35000 Rennes, France.*

<sup>b</sup> *Ecole Polytechnique Fédérale de Lausanne, EPFL-STI-LTP, Station 12, CH-1015 Lausanne,  
Switzerland.*

<sup>c</sup> *Institut Universitaire de France (IUF), MESRI, 1 rue Descartes, 75231 Paris, France.*

\*Corresponding author: Tel.: +33 2 23 23 80 27; [khalil.hanna@ensc-rennes.fr](mailto:khalil.hanna@ensc-rennes.fr)

Number of Pages: 7

Number of Figures: 4

Number of Tables: 2

Number of Text: 1

† Electronic supplementary information (ESI)

**Text S1:** Potential reactions in the FeOx<sub>3</sub>/PMS system under irradiation.

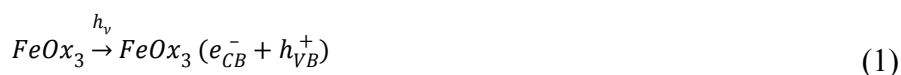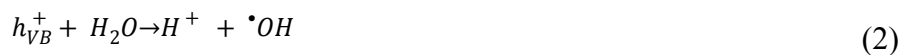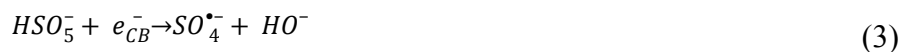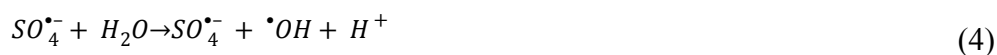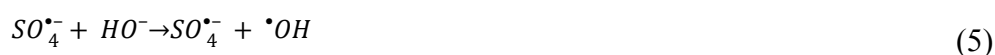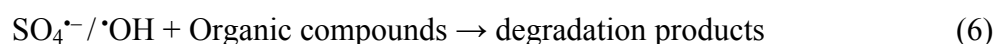

**Table S1.** Inorganic species and physico-chemical characteristics of SWW and RHW

|                                       | SWW     | RHW     |
|---------------------------------------|---------|---------|
| pH                                    | 8.0±0.5 | 6.8±0.2 |
| Turbidity (NTU)                       | 2±1     | 196±5   |
| Conductivity (μS cm <sup>-1</sup> )   | 1250±5  | 1340±5  |
| TOC (mg L <sup>-1</sup> )             | 70±5    | 50±10   |
| Suspended solid (mg L <sup>-1</sup> ) | 0       | 20±2    |
| Chloride (mg L <sup>-1</sup> )        | 450±20  | 620±10  |
| Nitrate (mg L <sup>-1</sup> )         | 35±2    | 7±2     |
| Sulfate (mg L <sup>-1</sup> )         | 20±2    | 60±10   |
| Phosphate (mg L <sup>-1</sup> )       | 150±10  | 60±10   |

Synthetic wastewater (SWW) were prepared by adding 400 mg L<sup>-1</sup> of NaCl, 50 mg L<sup>-1</sup> of citric acid, 100 mg L<sup>-1</sup> of sucrose and 230 mg L<sup>-1</sup> Na<sub>2</sub>HPO<sub>4</sub> to tap water (conductivity 408 μS cm<sup>-1</sup>).

**Table S2.** Reactivity percentage of radicals with species in solution

| Radical            | Species and concentration | $k''$ ( $M^{-1} s^{-1}$ ) | $k'$ ( $s^{-1}$ ) | % of reactivity |
|--------------------|---------------------------|---------------------------|-------------------|-----------------|
| HO $\cdot$         | FLU (5 $\mu$ M)           | $1.2 \times 10^{10}$      | $0.6 \times 10^5$ | 2               |
|                    | t-But (5 mM)              | $6.0 \times 10^8$         | $3.0 \times 10^6$ | 98              |
| SO $_4^{\bullet-}$ | FLU (5 $\mu$ M)           | $1.8 \times 10^9$         | $0.9 \times 10^4$ | 68              |
|                    | t-But (5 mM)              | $8.4 \times 10^5$         | $4.2 \times 10^3$ | 32              |

$k''$ : second order rate constant and  $k' = k'' * [\text{species}]$

% of reactivity indicates the percentage of hydroxyl radicals or sulfate radicals reacted.

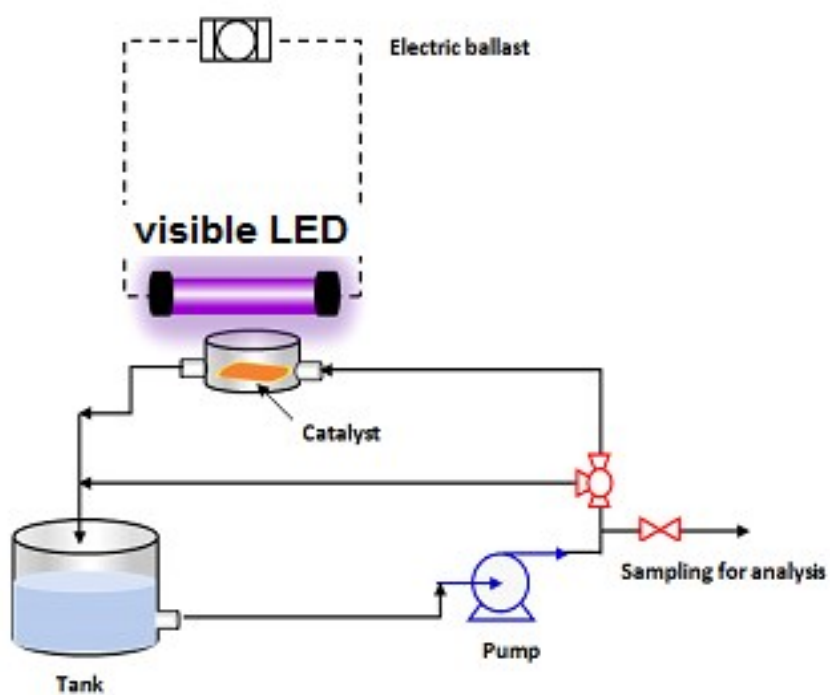

**Fig. S1.** Schematic diagram of recirculation glass reactor system

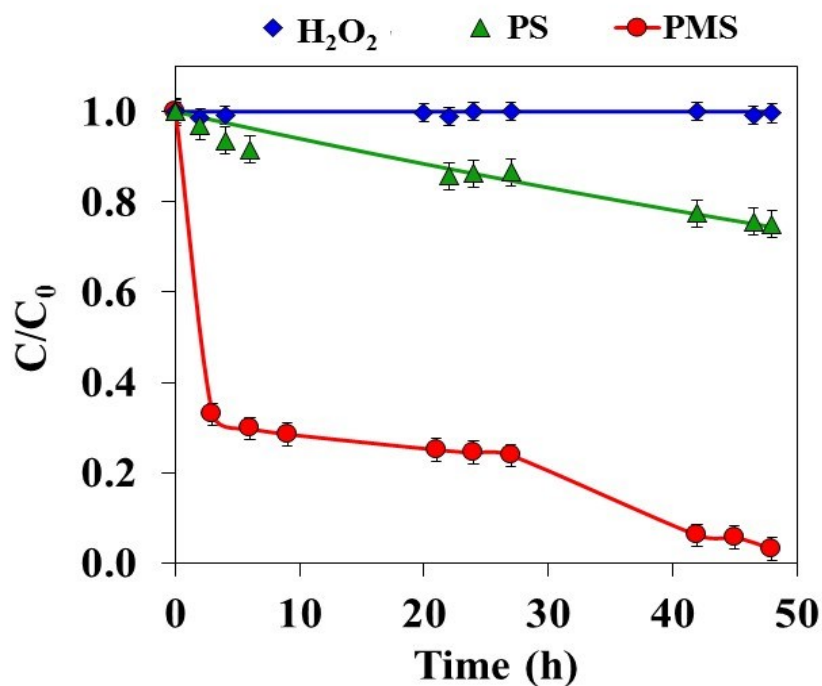

**Fig. S2.** Effect of oxidant on FLU removal with catalyst  $FeOx_3$  under visible irradiation. Experimental conditions:  $[FeOx_3] = 0.26 \text{ g m}^{-2}$  on PES,  $[FLU]_0 = 5 \text{ }\mu\text{M}$ , visible reaction time = 48 h,  $pH_0 = 7.0 \pm 0.2$ ,  $V = 200 \text{ mL}$ , recirculation flow rate =  $325 \text{ mL min}^{-1}$ ,  $[H_2O_2]_0 = [PS]_0 = [PMS]_0 = 0.5 \text{ mM}$ . Abbreviations: FLU = flumequine, PS = persulfate,  $H_2O_2$  = hydrogen peroxide, PMS = peroxymonosulfate,  $FeOx_3$  corresponding to 3%  $O_2$  in the sputtering chamber. For PMS, the solid line is only a visual guide.

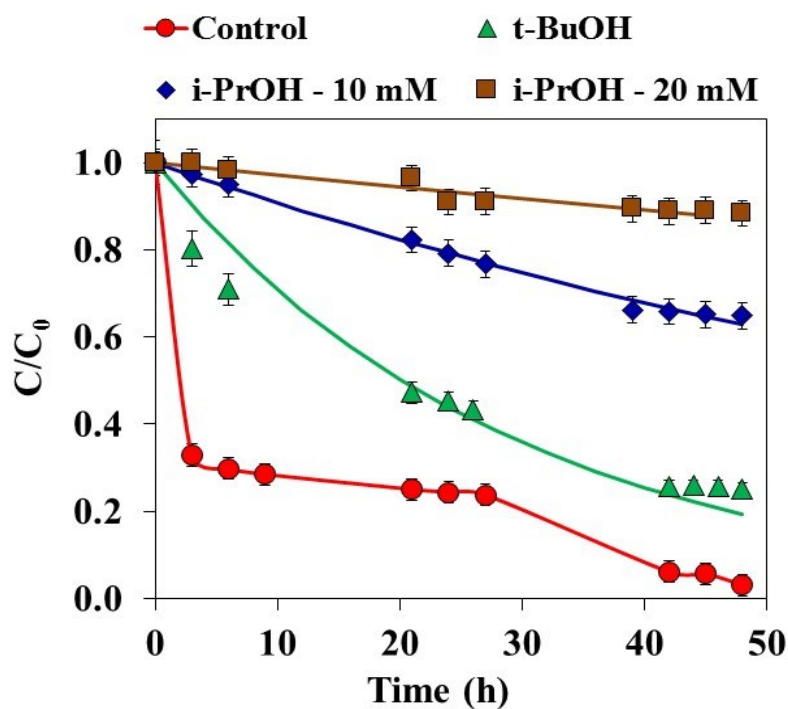

**Fig. S3.** Effect of radicals scavengers on FLU removal. Experimental conditions:  $[\text{FLU}]_0 = 5 \mu\text{M}$ ,  $[\text{PMS}]_0 = 0.5 \text{ mM}$ ,  $[\text{FeOx}_3] = 0.26 \text{ g m}^{-2}$  on PES, reaction time = 48 h,  $[\text{i-PrOH}]_0 = 10 - 20 \text{ mM}$ ,  $[\text{t-BuOH}]_0 = 5 \text{ mM}$ , visible reaction time = 48 h,  $\text{pH}_0 = 7.0 \pm 0.2$ ,  $V = 200 \text{ mL}$ , recirculation flowrate =  $325 \text{ mL min}^{-1}$ . Abbreviations: FLU = flumequine, PMS = peroxymonosulfate, t-BuOH = tert-Butyl alcohol, i-PrOH= isopropanol,  $\text{FeOx}_3$  corresponding to 3%  $\text{O}_2$  in the sputtering chamber. For the control test, the solid line is only a visual guide.

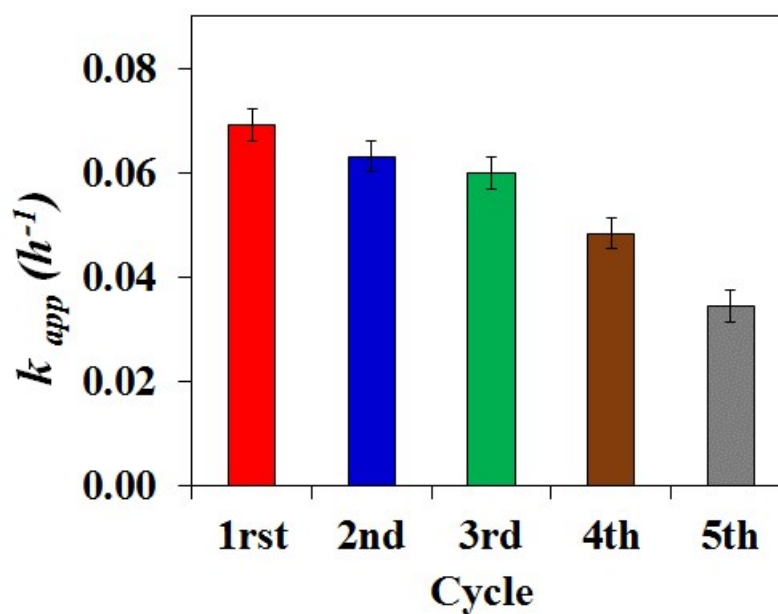

**Fig. S4.** FLU removal rate constant in RHW using FeOx<sub>3</sub>-PES for five successive oxidation runs. Experimental conditions: [FLU]<sub>0</sub> = 5 μM, [PMS]<sub>0</sub> = 3 mM, [FeOx<sub>3</sub>] = 0.26 g m<sup>-2</sup> on PES, pH<sub>0</sub> = 7.0 ± 0.2, reaction time = 48 h, recirculation flow rate = 325 mL min<sup>-1</sup>. Abbreviations: FLU = flumequine, PMS = peroxymonosulfate, RHW = Real Hospital Wastewater, FeOx<sub>3</sub> corresponding to 3% O<sub>2</sub> in the sputtering chamber.
